# Supplementary material for: A silicon doped carbon dot-based fluorescent sensor for doxorubicin detection
Source: Royal Society of Chemistry journal article supplement (doi:10.1039/d5an01122a), 2025-12-19
Supplement: d5an01122a1.pdf [file d5an01122a1.pdf]

## **Electronic Supplementary Information (ESI)**

### **Silicon doped carbon dots-based fluorescent sensor for doxorubicin detection**

Shixiang Dong, Lin Zhang,\* Jia Ge,\* Xilin Dong, Haoran Liu, Changyu Wang, Zhaohui  
Li\*

College of Chemistry, Henan Joint International Research Laboratory of Green  
Construction of Functional Molecules and Their Bioanalytical Applications,  
Zhengzhou University, Zhengzhou 450001, China

\*Corresponding authors. E-mail address: [jiage@zzu.edu.cn](mailto:jiage@zzu.edu.cn); [linzhang@zzu.edu.cn](mailto:linzhang@zzu.edu.cn),  
[zhaohui.li@zzu.edu.cn](mailto:zhaohui.li@zzu.edu.cn).

## Characterization instrumentation

The sizes and morphologies of the Si-CDs were observed by a transmission electron microscopy (TEM). X-ray photoelectron spectroscopy spectra (XPS) was recorded on an X-ray photoelectron spectrometer (ESCALAB 250XI). Ultraviolet-visible absorption spectra (UV-Vis) were measured on a TU-1900 ultraviolet spectrophotometer, the fluorescence performances of Si-CDs were analyzed by fluorescence spectrometer (F-7100), respectively.

## Fluorescence quantum yield measurement

The quantum yield (QY) of Si-CDs was determined using previously reported methods.<sup>1,2</sup> QY<sub>c</sub> was calculated using Eq. (1), with quinine sulfate (QY<sub>s</sub>=0.55) in 0.1 mol/L H<sub>2</sub>SO<sub>4</sub> as the reference.

$$QY_c = QY_s \times \frac{K_c}{K_s} \times \left(\frac{\eta_c}{\eta_s}\right)^2 \times 100\% \quad (1)$$

where QY<sub>c</sub> is the quantum yield, K is the slope of the linear fit between integrated fluorescence intensity and absorbance,  $\eta$  is the refractive index of the solvents ( $\eta_c=\eta_s=1.33$ ), and the subscripts “c” and “s” refer to Si-CDs and quinine sulfate solutions, respectively.

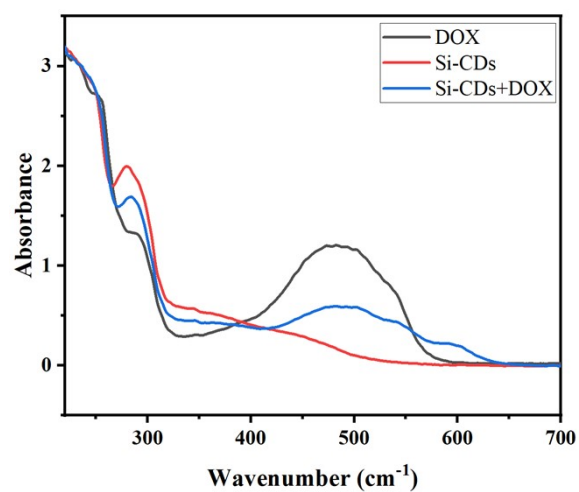

**Fig. S1.** UV-vis absorption spectrum of Si-CDs (black), DOX (red), Si-CDs+DOX (blue).

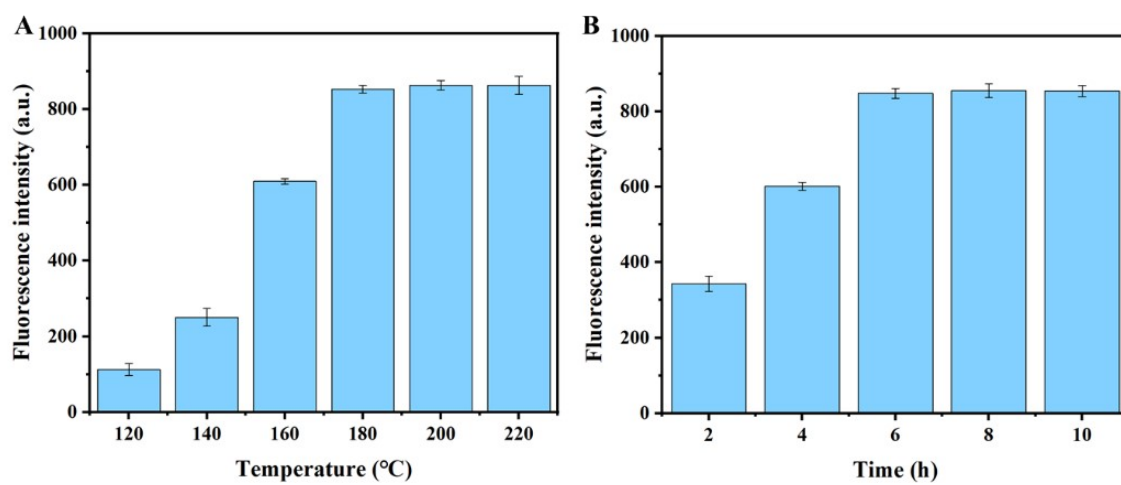

**Fig. S2.** (A) Effect of the synthesis temperature on the fluorescence intensity of Si-CDs; (B) Effect of the synthesis time on the fluorescence intensity of Si-CDs

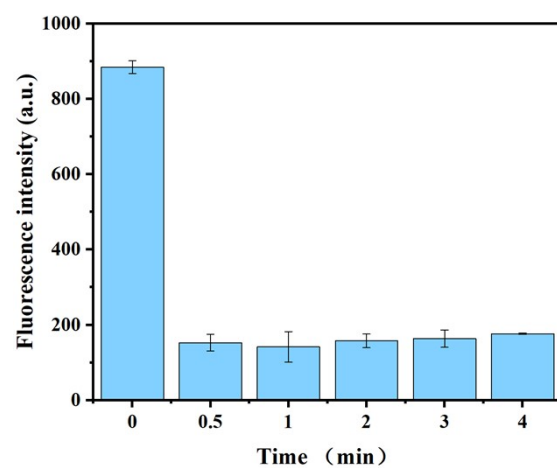

**Fig. S3.** Time-dependent interaction between Si-CDs and DOX (200  $\mu\text{mol/L}$ ) at room temperature.

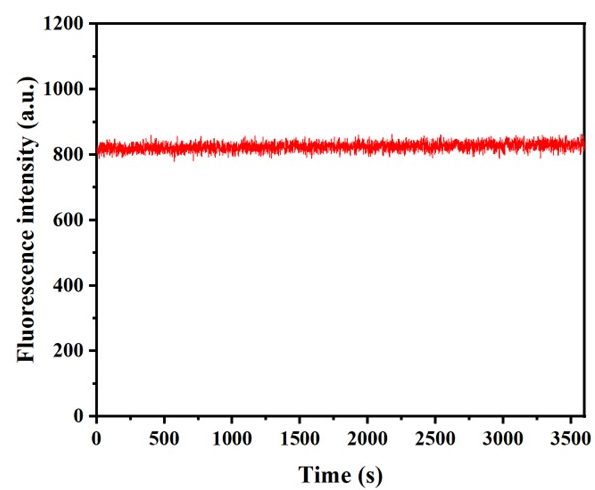

**Fig. S4.** Fluorescence intensity of Si-CDs as function of time.

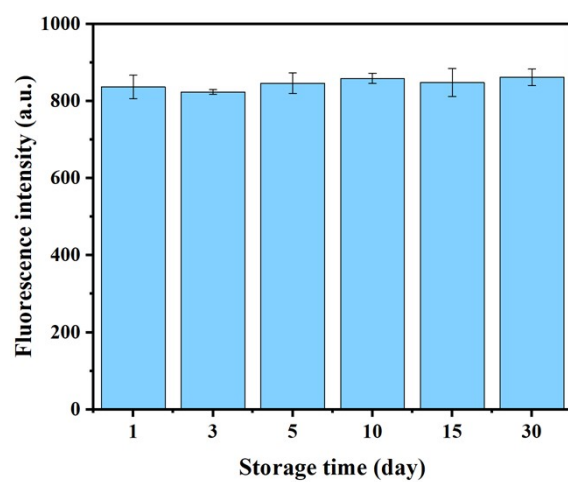

**Fig. S5.** The stability investigation of Si-CDs stored for different period.

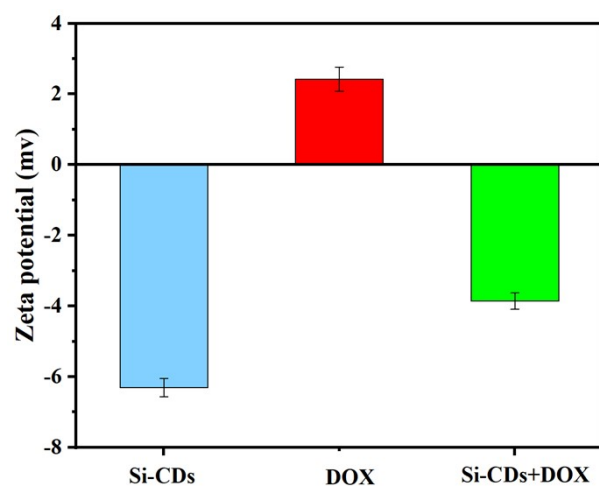

**Fig. S6.** Zeta potential of Si-CDs (blue), DOX (red) and Si-CDs+DOX (green)



**Table S1.** Comparison with other developed fluorescent probes for DOX detection.

| Determination of DOX | LOD (nM) | Linear range ( $\mu\text{M}$ ) | Ref.      |
|----------------------|----------|--------------------------------|-----------|
| CC/DTT-AuNCs         | 5        | 0.05-2                         | 3         |
| CdS@PCN-224          | 3.57     | 0.01-1                         | 4         |
| PEI-CDs              | 75.2     | 0.1-150                        | 5         |
| MUA-CDs              | 600      | 0.25-19.96                     | 6         |
| P-CQDs               | 120      | 1-30                           | 7         |
| Si-CDs               | 6        | 0.05-50                        | This work |

## References :

- 1 J. Chen, M. Q. Zhang, Z. J. Xu, R. X. Ma and Q. D. Shi, *Sci. Total Environ.*, 2023, **896**, 165136.
- 2 K. X. Chen, Q. F. Chen and M. Zhu, *Int. J. Biol. Macromol.*, 2025, **309**, 142926.
- 3 K. Y. Huang, H. X. He, S. B. He, X. P. Zhang, H. P. Peng, Z. Lin, H. H. Deng, X. H. Xia and W. Chen, *Sens. Actuators, B*, 2019, **296**, 126656.
- 4 W. X. Dong, Z. P. Li, W. Wen, B. Liu and G. M. Wen, *ACS Appl. Mater. Interfaces*, 2021, **13**, 57497-57504.
- 5 M. Yang, Y. J. Yan, E. Z. Liu, X. Y. Hu, H. Hao and J. Fan, *Opt. Mater.*, 2021, **112**, 110743.
- 6 L. Zhang, H. Z. Xing, W. Liu, Z. H. Wang, Y. M. Hao, H. P. Wang, W. J. Dong, Y. Liu, S. M. Shuang, C. Dong and X. J. Gong, *ACS Appl. Nano Mater.*, 2021, **4**, 13734-13746.
- 7 J. T. Zhu, H. Y. Chu, J. W. Shen, C. Z. Wang and Y. M. Wei, *Opt. Mater.*, 2021, **114**, 110941.
